# Supplementary material
Source: publisher site journal article supplement (https://www.dovepress.com/get_supplementary_file.php?f%1622.pdf)
Supplement: Supplementary file [file get_supplementary_file.php]

## Supplementary information

### Table S1

| genesymbol   | logFC    | AveExpr  | t        | P.Value  | adj.P.Val | B        |
|--------------|----------|----------|----------|----------|-----------|----------|
| PRAMEF12     | 1.207071 | 5.289291 | 15.33987 | 3.69E-15 | 7.54E-11  | 24.04307 |
| HIST1H4D     | 1.424006 | 4.757918 | 10.87205 | 1.46E-11 | 2.14E-08  | 16.37059 |
| DIO3OS       | -1.07802 | 5.010649 | -10.6195 | 2.50E-11 | 2.58E-08  | 15.86311 |
| LINC00669    | 1.009978 | 3.622366 | 8.019865 | 9.81E-09 | 2.31E-06  | 10.11646 |
| RAB43        | 1.398519 | 6.104695 | 7.799001 | 1.70E-08 | 3.31E-06  | 9.584161 |
| RAB3A        | 1.048865 | 6.360564 | 7.454428 | 4.04E-08 | 6.36E-06  | 8.740609 |
| LOC101559451 | 1.489303 | 4.69809  | 7.219217 | 7.36E-08 | 1.04E-05  | 8.155938 |
| HIST1H2BJ    | 1.296716 | 4.735321 | 6.921871 | 1.59E-07 | 1.79E-05  | 7.407069 |
| MIR205       | 1.289967 | 5.374969 | 6.9127   | 1.63E-07 | 1.82E-05  | 7.383807 |
| CYP27B1      | 1.384973 | 4.95497  | 6.893078 | 1.71E-07 | 1.88E-05  | 7.334001 |
| DTWD2        | 1.063432 | 6.385036 | 6.573049 | 3.96E-07 | 3.56E-05  | 6.515681 |
| SMIM6        | 1.32327  | 5.206901 | 6.324409 | 7.66E-07 | 6.05E-05  | 5.87264  |
| MDFI         | 1.392549 | 6.184767 | 5.895932 | 2.42E-06 | 0.000152  | 4.751904 |
| SIGLEC15     | 1.487419 | 5.186075 | 5.73334  | 3.75E-06 | 0.000213  | 4.323239 |
| SLFN13       | 1.061665 | 5.963109 | 5.565351 | 5.92E-06 | 0.000306  | 3.878868 |
| RBM20        | -1.60918 | 4.314142 | -5.22653 | 1.49E-05 | 0.000604  | 2.979619 |
| CHGB         | -1.00379 | 4.833502 | -5.11816 | 2.01E-05 | 0.000745  | 2.691602 |
| RAB9B        | -1.31308 | 5.857783 | -5.08586 | 2.19E-05 | 0.000792  | 2.605751 |

|           |          |          |          |          |          |          |
|-----------|----------|----------|----------|----------|----------|----------|
| OR2B6     | 1.205192 | 5.157871 | 5.027475 | 2.57E-05 | 0.000885 | 2.450602 |
| MIR3916   | 1.061888 | 4.967606 | 4.964518 | 3.05E-05 | 0.001004 | 2.283349 |
| GPR19     | 1.316795 | 5.888145 | 4.910771 | 3.54E-05 | 0.00113  | 2.140623 |
| HSH2D     | 1.188738 | 6.08417  | 4.636576 | 7.48E-05 | 0.001954 | 1.414084 |
| MYOCD     | -1.22853 | 4.588151 | -4.56978 | 8.97E-05 | 0.002239 | 1.237695 |
| SNAP91    | -1.36359 | 4.277127 | -4.53797 | 9.79E-05 | 0.002384 | 1.1538   |
| SECTM1    | 1.236607 | 7.458027 | 4.530132 | 1.00E-04 | 0.002427 | 1.133133 |
| AVIL      | 1.016075 | 6.946313 | 4.490167 | 0.000111 | 0.002631 | 1.027866 |
| ARHGAP11A | 1.277471 | 5.264279 | 4.431664 | 0.000131 | 0.002972 | 0.874006 |
| FOXM1     | 1.138544 | 8.900434 | 4.393395 | 0.000145 | 0.003237 | 0.773528 |
| ARHGEF39  | 1.003064 | 5.793635 | 4.373628 | 0.000153 | 0.003364 | 0.721683 |
| SYNPO2    | -1.06032 | 5.728157 | -4.34083 | 0.000167 | 0.00357  | 0.635737 |
| VSIG10    | 1.07696  | 6.050544 | 4.298288 | 0.000188 | 0.003925 | 0.524454 |
| NR2F2-AS1 | -1.21195 | 5.675253 | -4.24935 | 0.000214 | 0.004323 | 0.396679 |
| MCM10     | 1.203102 | 7.064613 | 4.231573 | 0.000225 | 0.004461 | 0.350336 |
| SOD3      | -1.16501 | 6.54615  | -4.20116 | 0.000244 | 0.004751 | 0.271137 |
| C11orf96  | -1.65338 | 8.573225 | -4.13404 | 0.000293 | 0.00537  | 0.096787 |
| MAGEA4    | 2.929644 | 5.125202 | 4.133925 | 0.000293 | 0.00537  | 0.096488 |
| CORO2B    | -1.74196 | 6.570569 | -4.03113 | 0.000386 | 0.006569 | -0.16929 |
| LPAR4     | -1.39544 | 4.687492 | -4.02239 | 0.000395 | 0.006677 | -0.19181 |
| C3orf70   | -1.25567 | 5.0426   | -4.00371 | 0.000416 | 0.006932 | -0.23991 |

|          |          |          |          |          |          |          |
|----------|----------|----------|----------|----------|----------|----------|
| IDI2-AS1 | 1.333035 | 5.018577 | 3.99696  | 0.000423 | 0.006985 | -0.25728 |
| CDC7     | 1.028434 | 8.280842 | 3.980913 | 0.000442 | 0.007151 | -0.29853 |
| KIAA1524 | 1.100338 | 5.598609 | 3.920974 | 0.000519 | 0.00806  | -0.45224 |
| HLF      | -1.46184 | 4.423035 | -3.90847 | 0.000536 | 0.008252 | -0.48424 |
| RYR2     | -1.79947 | 5.168596 | -3.89399 | 0.000558 | 0.008476 | -0.52124 |
| PDK4     | -1.17942 | 6.060854 | -3.88309 | 0.000574 | 0.008655 | -0.54907 |
| ZDBF2    | -1.4947  | 5.553763 | -3.86779 | 0.000598 | 0.008917 | -0.58808 |
| MAGEL2   | -1.28729 | 4.96085  | -3.85551 | 0.000618 | 0.009127 | -0.61939 |
| CCL7     | 1.012372 | 4.602722 | 3.838586 | 0.000646 | 0.009452 | -0.66246 |
| ALDH8A1  | 1.689326 | 5.13798  | 3.817002 | 0.000684 | 0.009834 | -0.71731 |
| PAQR4    | 1.12182  | 7.682946 | 3.809912 | 0.000697 | 0.009986 | -0.73531 |
| NCAPH    | 1.112504 | 7.327264 | 3.784686 | 0.000746 | 0.010444 | -0.79928 |
| KIF14    | 1.13913  | 7.511816 | 3.777391 | 0.00076  | 0.01059  | -0.81775 |
| GAGE3    | 1.002629 | 3.859782 | 3.771156 | 0.000773 | 0.010723 | -0.83353 |
| PRSS50   | 1.305398 | 6.146884 | 3.762777 | 0.00079  | 0.010889 | -0.85472 |
| THRB     | 1.470126 | 6.544393 | 3.719847 | 0.000885 | 0.011763 | -0.96307 |
| MUM1L1   | -2.21485 | 7.146803 | -3.71853 | 0.000888 | 0.011778 | -0.96639 |
| SCN7A    | -1.37909 | 3.996073 | -3.69009 | 0.000958 | 0.012371 | -1.03794 |
| H1FO     | 1.114338 | 10.8409  | 3.682359 | 0.000977 | 0.01257  | -1.05735 |
| IL12A    | 1.519046 | 5.008138 | 3.636946 | 0.001102 | 0.013627 | -1.17113 |
| PARP9    | 1.100782 | 8.619709 | 3.629762 | 0.001122 | 0.013788 | -1.18909 |

|              |          |          |          |          |          |          |
|--------------|----------|----------|----------|----------|----------|----------|
| CCNO         | 1.057846 | 6.932072 | 3.62702  | 0.001131 | 0.013852 | -1.19594 |
| FGF2         | -1.03059 | 4.543535 | -3.6139  | 0.00117  | 0.014218 | -1.22869 |
| ICAM4        | 1.182265 | 4.437161 | 3.596863 | 0.001224 | 0.014718 | -1.27116 |
| PP12719      | 1.154199 | 7.089101 | 3.589834 | 0.001246 | 0.014939 | -1.28866 |
| LOC100507459 | 1.040096 | 5.885267 | 3.557289 | 0.001357 | 0.016032 | -1.36953 |
| SEMA3F       | 1.119256 | 7.799048 | 3.552949 | 0.001373 | 0.016143 | -1.38029 |
| STIL         | 1.045615 | 8.654045 | 3.55266  | 0.001374 | 0.016143 | -1.38101 |
| HIST1H2BH    | 1.220937 | 8.39381  | 3.550694 | 0.001381 | 0.016194 | -1.38588 |
| SPESP1       | 2.308003 | 5.582286 | 3.513331 | 0.001522 | 0.017414 | -1.47833 |
| FOXJ1        | 1.286064 | 7.697082 | 3.483935 | 0.001643 | 0.018429 | -1.55081 |
| ABCA6        | -1.13743 | 4.018974 | -3.48059 | 0.001657 | 0.018538 | -1.55903 |
| SLCO6A1      | 1.066536 | 5.233817 | 3.480155 | 0.001659 | 0.018549 | -1.56011 |
| SDC2         | -1.2541  | 7.054215 | -3.46295 | 0.001735 | 0.019176 | -1.6024  |
| DSC2         | 1.153988 | 6.913907 | 3.446824 | 0.001809 | 0.019792 | -1.64197 |
| TGM1         | 1.00943  | 6.909307 | 3.375911 | 0.002172 | 0.02255  | -1.81509 |
| CITED4       | 1.013713 | 7.698356 | 3.371486 | 0.002197 | 0.022754 | -1.82585 |
| CNRIP1       | -1.25928 | 6.990707 | -3.36942 | 0.002209 | 0.022838 | -1.83088 |
| GGT6         | 1.781372 | 7.279187 | 3.367898 | 0.002218 | 0.022858 | -1.83456 |
| MGP          | -1.10193 | 6.79063  | -3.34348 | 0.002361 | 0.02381  | -1.89378 |
| ARMC2        | 1.048354 | 5.494676 | 3.319641 | 0.00251  | 0.024643 | -1.95142 |
| RHOBTB3      | -1.02187 | 5.772907 | -3.31891 | 0.002515 | 0.024675 | -1.95318 |

|              |          |          |          |          |          |          |
|--------------|----------|----------|----------|----------|----------|----------|
| EPS8         | -1.1772  | 8.953691 | -3.2807  | 0.002773 | 0.026435 | -2.0452  |
| PLN          | -1.24667 | 3.845452 | -3.27658 | 0.002802 | 0.026628 | -2.05509 |
| ZCCHC12      | -1.78463 | 4.712185 | -3.25207 | 0.002983 | 0.027839 | -2.11384 |
| PIK3R3       | 1.064161 | 7.479607 | 3.242339 | 0.003057 | 0.028381 | -2.1371  |
| ZBP1         | 1.079929 | 5.187188 | 3.212107 | 0.003301 | 0.029816 | -2.20919 |
| COL2A1       | -1.18019 | 5.568308 | -3.20663 | 0.003347 | 0.030089 | -2.22221 |
| GLT8D2       | -1.33456 | 7.19004  | -3.1881  | 0.003508 | 0.031151 | -2.26622 |
| KIT          | -1.25707 | 5.878793 | -3.16482 | 0.00372  | 0.032479 | -2.32134 |
| ZFPM2        | -1.78214 | 7.241303 | -3.15865 | 0.003779 | 0.032841 | -2.33591 |
| MFAP4        | -1.64735 | 6.66364  | -3.10728 | 0.004299 | 0.036004 | -2.45676 |
| EP300-AS1    | 1.056208 | 5.048299 | 3.104691 | 0.004327 | 0.036169 | -2.46283 |
| CCDC178      | -1.11646 | 5.638482 | -3.10118 | 0.004365 | 0.036352 | -2.47106 |
| PCDH7        | 1.046575 | 5.632641 | 3.101005 | 0.004367 | 0.036352 | -2.47146 |
| PROK1        | -1.14428 | 4.496464 | -3.09399 | 0.004445 | 0.036785 | -2.48789 |
| CLMP         | -1.2583  | 5.275867 | -3.07677 | 0.00464  | 0.037868 | -2.52808 |
| NAP1L3       | -1.75997 | 6.651807 | -3.06619 | 0.004764 | 0.038574 | -2.55275 |
| DACT1        | -1.39892 | 5.884511 | -3.028   | 0.005239 | 0.041074 | -2.6414  |
| LOC101930657 | 1.040286 | 4.830437 | 3.002436 | 0.005582 | 0.042951 | -2.70043 |
| METTL7B      | 1.13817  | 7.038463 | 2.956726 | 0.006249 | 0.046438 | -2.80535 |
| GEM          | -1.28048 | 6.598537 | -2.95574 | 0.006264 | 0.046492 | -2.80759 |
| NDNF         | -1.2684  | 5.84311  | -2.9474  | 0.006393 | 0.047173 | -2.82665 |

|         |          |          |          |          |          |          |
|---------|----------|----------|----------|----------|----------|----------|
| IFIT2   | 1.222828 | 7.614511 | 2.94694  | 0.006401 | 0.04721  | -2.8277  |
| LYPLAL1 | -1.75587 | 7.243634 | -2.94413 | 0.006445 | 0.047451 | -2.83411 |
| ZNF43   | 1.05296  | 7.538252 | 2.940662 | 0.0065   | 0.047806 | -2.84202 |
| LRRN4CL | -1.01092 | 5.887386 | -2.93606 | 0.006574 | 0.048193 | -2.85251 |
| FOXL2   | -1.72174 | 5.599786 | -2.92659 | 0.006729 | 0.049009 | -2.87406 |
| BCL11A  | 1.33662  | 7.94142  | 2.919749 | 0.006842 | 0.049591 | -2.88962 |
| CYP27C1 | -1.03285 | 3.708601 | -2.91915 | 0.006852 | 0.049593 | -2.89097 |

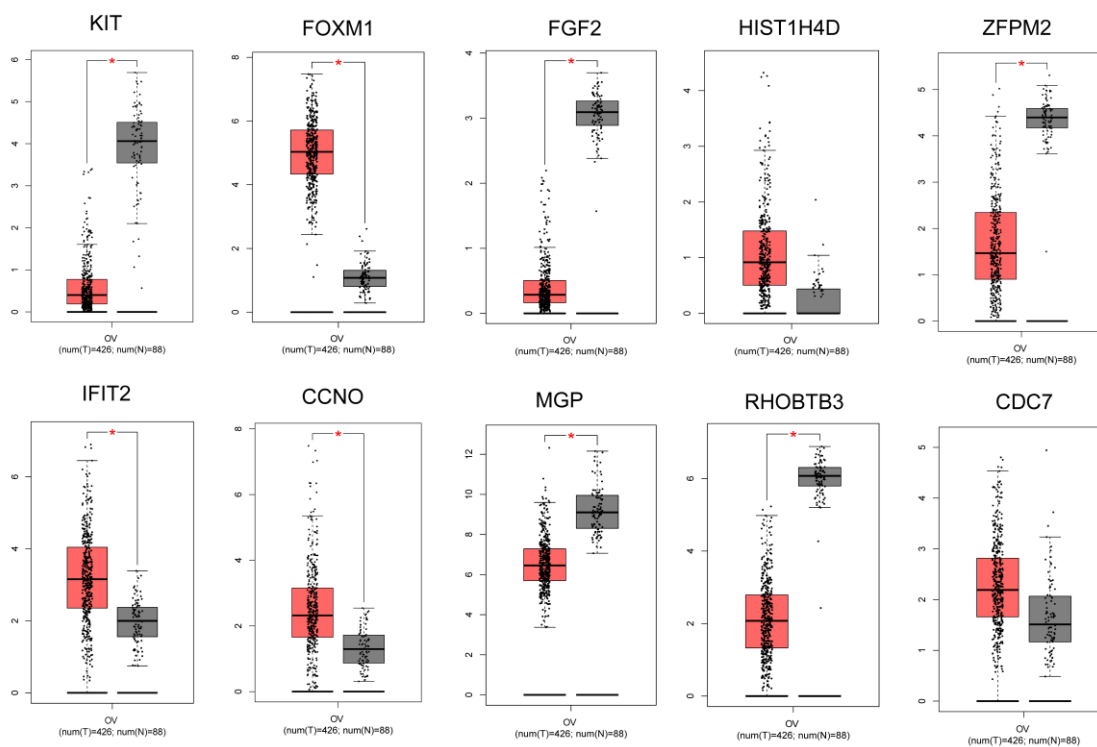

Figure S1
